# Supplementary material for: Surgical complications of extraspinal tumors in the cervical spine: a report of 110 cases and literature review
Source: Springer Nature journal article supplement (doi:10.1007/s00586-017-5259-4), 2017-08-17
Supplement: MOESM1 [file 14222376]

**Table A1. Histologic Analysis**

| Pathological classification | N | % |
| --- | --- | --- |
| Primary | 68 | 61.8 |
| Chordoma | 18 | 26.5 |
| Osteoblastoma | 12 | 17.6 |
| Giant cell tumor of the bone | 11 | 16.2 |
| Fibrous dysplasia of bone | 4 | 5.9 |
| Osteoidosteoma | 4 | 5.9 |
| Chondrosarcoma | 3 | 4.4 |
| Malignant solitary fibrous tumor | 3 | 4.4 |
| Aneurysmal bone cyst | 2 | 2.9 |
| Hemangioma | 2 | 2.9 |
| Osteochondromatosis | 2 | 2.9 |
| Primitive neuroectodermal tumor | 2 | 2.9 |
| Chondroblastoma | 1 | 1.5 |
| Eosinophilic granuloma | 1 | 1.5 |
| Magligant fibromatosis | 1 | 1.5 |
| Osteosarcoma | 1 | 1.5 |
| Spindle cell sarcoma | 1 | 1.5 |
| Metastatic | 42 | 38.2 |
| Lung cancer | 12 | 28.6 |
| Thyroid carcinoma | 8 | 19.0 |
| Plasmocytoma | 7 | 16.7 |
| Breast cancer | 5 | 11.9 |
| Pancreatic cancer | 2 | 4.8 |
| Liver cancer | 2 | 4.8 |
| Prostate cancer | 1 | 2.4 |
| Colon cancer | 1 | 2.4 |
| Alveolar soft tissue sarcoma | 1 | 2.4 |
| Nasopharyngeal cancer | 1 | 2.4 |
| Renalcarcinoma | 1 | 2.4 |
| Thymoma | 1 | 2.4 |
| Total | 110 | 100.0 |

**Table A2. Risk Factors for Neurological Deficit**

| Variable | Neurological deficit | | | |
| --- | --- | --- | --- | --- |
| Yes (%) | No (%) | OR (95% CI) | *P* |
| **Univariable analysis** |  |  |  |  |
| Age ≥65 years old | 0 (0.0) | 15 (16.0) |  | 0.121 |
| Male | 8 (50.0) | 55 (58.5) | 0.71 (0.25–2.05) | 0.525 |
| Comorbidity | 4 (25.0) | 29 (30.9) | 0.75 (0.22–2.51) | 0.773 |
| Karnofsky score <60 | 4 (25.0) | 17 (18.1) | 1.51 (0.43–5.26) | 0.503 |
| Radiotherapy | 4 (25.0) | 44 (46.8) | 0.38 (0.11–1.26) | 0.104 |
| Chemotherapy | 2 (12.5) | 18 (19.1) | 0.60 (0.13–2.89) | 0.732 |
| Non–intact | 3 (18.8) | 4 (4.3) | 5.19 (1.04–25.87) | 0.062 |
| Metastasis | 2 (12.5) | 40 (42.6) | 0.19 (0.04–0.90) | 0.022 |
| C1–C2 | 2 (12.5) | 34 (36.2) | 0.25 (0.05–1.18) | 0.062 |
| Combined approach | 11 (68.8) | 25 (26.6) | 6.07 (1.92–19.21) | 0.001 |
| Multisegmental resection | 10 (62.5) | 28 (29.8) | 3.93 (1.30–11.86) | 0.011 |
| Curettage/debulking | 5 (31.3) | 65 (69.1) | 0.20 (0.07–0.64) | 0.004 |
| Operation time >3 h | 14 (87.5) | 41 (43.6) | 9.05 (1.95–42.07) | 0.001 |
| Intraoperative blood loss >500 ml | 10 (62.5) | 42 (44.7) | 2.06 (0.69–6.14) | 0.187 |
| **Multivariable analysis** |  |  |  |  |
| C1–2 |  |  | 0.18 (0.04–0.87) | 0.033 |
| Operation time >3 h |  |  | 11.30 (2.37–53.99) | 0.002 |

OR, Odds Ratio. CI, Confidence Interval.
